# Supplementary material for: The Expression and Prognostic Significance of Retinoic Acid Metabolising Enzymes in Colorectal Cancer
Source: PubMed Central journal article supplement (PMC3946526; doi:10.1371/journal.pone.0090776), 2014-03-07
Supplement: pone.0090776.s001.pdf [file pone.0090776.s001.pdf]

Supporting information

**Table S1.** Clinicopathological characteristics of the patients and their tumours included in the colorectal cancer tissue microarray.

|                          | Percent<br>(number) | Mean survival<br>(months, 95% CI) | Relationship with survival, hazard ratio and (95% CI)                 |
|--------------------------|---------------------|-----------------------------------|-----------------------------------------------------------------------|
| Sex                      |                     |                                   |                                                                       |
| Male                     | 52% (340)           | 114 (104-126)                     | $\chi^2=0.027$ , $p=0.870$ , HR=0.982 (0.785-1.227)                   |
| Female                   | 48% (310)           | 112 (102-123)                     |                                                                       |
| Age<br>(mean:range)      | (69:24-94)          |                                   |                                                                       |
| < 70                     | 47% (305)           | 140 (129-151)                     | $\chi^2=29.213$ , $p=<0.001$ , HR=1.879 (1.488-2.373)                 |
| $\geq 70$                | 53% (345)           | 88 (80-96)                        |                                                                       |
| Tumour site <sup>1</sup> |                     |                                   |                                                                       |
| Colon                    | 78% (506)           | 113 (105-122)                     | Colon v rectum, $\chi^2=0.098$ , $p=0.754$ HR=1.043 (0.801-1.357)     |
| Proximal                 | 40% (261)           | 105 (92-117)                      | Proximal v distal, $\chi^2= 8.418$ , $p=0.004$ HR=0.685 (0.530-0.887) |
| Distal                   | 38% (245)           | 121 (109-133)                     | Distal v rectal, $\chi^2=0.906$ , $p=0.341$ , HR=0.864 (0.640-1.168)  |
| Rectum                   | 22% (144)           | 115 (97-133)                      |                                                                       |

Tumour differentiation

|               |           |               |                                                     |
|---------------|-----------|---------------|-----------------------------------------------------|
| Well/moderate | 92% (600) | 116 (108-124) | $\chi^2=0.976$ , $p=0.323$ , HR=1.223 (0.818-1.829) |
| Poor          | 8% (50)   | 100 (76-124)  |                                                     |

Tumour stage

|    |             |               |                                                               |
|----|-------------|---------------|---------------------------------------------------------------|
| T1 | 4.6% (30)   | 139 (112-165) | T1 v T2, $\chi^2=0.382$ , $p=0.536$ , HR=1.264 (0.600-2.666)  |
| T2 | 17.5% (114) | 163 (147-179) | T2 v T3, $\chi^2=24.739$ , $p<0.001$ , HR=0.392 (0.267-0.575) |
| T3 | 63.2% (411) | 107 (98-116)  | T3 v T4, $\chi^2=30.159$ , $p<0.001$ , HR=0.466 (0.352-0.617) |
| T4 | 14.6% (95)  | 56 (43-68)    |                                                               |

Nodal stage

|    |             |               |                                                               |
|----|-------------|---------------|---------------------------------------------------------------|
| N0 | 56.2% (365) | 147 (137-157) | N0 v N1, $\chi^2=54.071$ , $p<0.001$ , HR=0.384 (0.295-0.501) |
| N1 | 27.1% (176) | 87 (74-101)   | N1 v N2, $\chi^2=17.636$ , $p<0.001$ , HR=0.548 (0.412-0.731) |
| N2 | 16.8% (109) | 51 (40-62)    |                                                               |

EMVI

|         |             |               |                                                       |
|---------|-------------|---------------|-------------------------------------------------------|
| Present | 21.5% (140) | 56 (46-67)    | $\chi^2=100.946$ , $p<0.001$ , HR=3.139 (2.479-3.974) |
| Absent  | 78.5% (510) | 132 (123-141) |                                                       |

Microsatellite instability

(MSI) status

|                |             |               |                                                     |
|----------------|-------------|---------------|-----------------------------------------------------|
| Intact         | 82.5% (536) | 118 (110-127) | $\chi^2=2.848$ , $p=0.091$ , HR=1.294 (0.957-1.750) |
| Defective      | 14.8% (96)  | 98 (80-115)   |                                                     |
| Not assessable | 2.8% (18)   |               |                                                     |

Screen Detected

|     |           |               |                                                       |
|-----|-----------|---------------|-------------------------------------------------------|
| Yes | 8% (52)   | 120 (109-132) | $\chi^2=16.381$ , $p<0.001$ , HR= 3.827 (1.896-7.725) |
| No  | 92% (598) | 112 (103-120) |                                                       |

Stage

|                                                       |             |               |                                                                          |
|-------------------------------------------------------|-------------|---------------|--------------------------------------------------------------------------|
| Dukes A,<br>(Stage 1;<br>T1/T2, N0)                   | 18.5% (120) | 161 (145-177) | Dukes A v Dukes B, $\chi^2=5.059$ , $p=0.025$ , HR=0.632 (0.422-0.947)   |
| Dukes B,<br>(Stage 2;<br>T3/T4, N0)                   | 37.7% (245) | 125 (114-135) | Dukes B v Dukes C, $\chi^2= 65.510$ , $p<0.001$ , HR=0.364 (0.281-0.470) |
| Dukes C,<br>(Stage 3; any<br>T stage and<br>N1 or N2) | 43.8% (285) | 74 (64-84)    |                                                                          |

1. Proximal tumours are tumours proximal to the splenic flexure.
