# Supplementary material for: The Expression and Prognostic Significance of Retinoic Acid Metabolising Enzymes in Colorectal Cancer
Source: PubMed Central journal article supplement (PMC3946526; doi:10.1371/journal.pone.0090776), 2014-03-07
Supplement: pone.0090776.s002.pdf [file pone.0090776.s002.pdf]

**Table S2.** The relationship of the expression of CYP26A1, CYP26B1 and LRAT and survival in individual Dukes stage of colorectal cancer.

|             | Overall  |              | Negative v<br>weak/moderate/strong |         | Negative/weak v<br>moderate/strong |              | Negative/weak/moderate v<br>strong |              |
|-------------|----------|--------------|------------------------------------|---------|------------------------------------|--------------|------------------------------------|--------------|
|             | $\chi^2$ | p-value      | $\chi^2$                           | p-value | $\chi^2$                           | p-value      | $\chi^2$                           | p-value      |
| CYP26A1     |          |              |                                    |         |                                    |              |                                    |              |
| Dukes stage |          |              |                                    |         |                                    |              |                                    |              |
| A           | 0.967    | 0.809        | 0.434                              | 0.510   | 0.000                              | 0.997        | 0.154                              | 0.695        |
| B           | 2.756    | 0.431        | 0.549                              | 0.459   | 0.695                              | 0.404        | 0.406                              | 0.524        |
| C           | 9.425    | <b>0.024</b> | 2.496                              | 0.114   | 8.578                              | <b>0.003</b> | 5.895                              | <b>0.015</b> |
| CYP26B1     |          |              |                                    |         |                                    |              |                                    |              |
| A           | 3.760    | 0.289        | 2.559                              | 0.110   | 0.026                              | 0.872        | 0.083                              | 0.773        |
| B           | 1.758    | 0.624        | 1.532                              | 0.216   | 0.733                              | 0.392        | 0.020                              | 0.887        |
| C           | 11.127   | <b>0.011</b> | 2.965                              | 0.085   | 10.004                             | <b>0.002</b> | 7.215                              | <b>0.007</b> |
| LRAT        |          |              |                                    |         |                                    |              |                                    |              |
| A           | 2.478    | 0.479        | 0.863                              | 0.353   | 0.835                              | 0.361        | 2.191                              | 0.139        |
| B           | 1.357    | 0.716        | 0.010                              | 0.921   | 0.206                              | 0.650        | 0.137                              | 0.711        |
| C           | 3.101    | 0.376        | 0.463                              | 0.496   | 1.814                              | 0.178        | 3.025                              | 0.082        |

Significant values are highlighted in bold
