# Supplementary material for: The Expression and Prognostic Significance of Retinoic Acid Metabolising Enzymes in Colorectal Cancer
Source: PubMed Central journal article supplement (PMC3946526; doi:10.1371/journal.pone.0090776), 2014-03-07
Supplement: pone.0090776.s003.pdf [file pone.0090776.s003.pdf]

**Table S3.** The relationship of the expression of CYP26A1, CYP26B1 and LRAT and survival in colon cancer and rectal cancer.

|         |        | Negative v weak v moderate v strong |              | Negative v weak/moderate/strong |              | Negative and weak v moderate and strong |         | Negative, weak and moderate v strong |                  |
|---------|--------|-------------------------------------|--------------|---------------------------------|--------------|-----------------------------------------|---------|--------------------------------------|------------------|
|         |        | $\chi^2$                            | p-value      | $\chi^2$                        | p-value      | $\chi^2$                                | p-value | $\chi^2$                             | p-value          |
| CYP26A1 |        |                                     |              |                                 |              |                                         |         |                                      |                  |
|         | Colon  | 0.736                               | 0.865        | 0.099                           | 0.753        | 0.689                                   | 0.407   | 0.167                                | 0.683            |
|         | Rectum | 5.833                               | 0.120        | 0.983                           | 0.322        | 0.761                                   | 0.383   | 0.056                                | 0.812            |
| CYP26B1 |        |                                     |              |                                 |              |                                         |         |                                      |                  |
|         | Colon  | 8.970                               | 0.030        | 3.028                           | 0.082        | 8.040                                   | 0.005   | 5.329                                | 0.021            |
|         | Rectum | 17.129                              | <b>0.001</b> | 4.841                           | <b>0.028</b> | 2.209                                   | 0.137   | 13.780                               | <b>&lt;0.001</b> |
| LRAT    |        |                                     |              |                                 |              |                                         |         |                                      |                  |
|         | Colon  | 3.522                               | 0.318        | 1.747                           | 0.186        | 3.259                                   | 0.071   | 2.339                                | 0.126            |
|         | Rectum | 2.750                               | 0.432        | 1.103                           | 0.294        | 2.597                                   | 0.107   | 1.883                                | 0.170            |

Significant values are highlighted in bold
