# Supplementary material for: The Expression and Prognostic Significance of Retinoic Acid Metabolising Enzymes in Colorectal Cancer
Source: PubMed Central journal article supplement (PMC3946526; doi:10.1371/journal.pone.0090776), 2014-03-07
Supplement: pone.0090776.s004.pdf [file pone.0090776.s004.pdf]

**Table S4.** The relationship of the expression of CYP26A1, CYP26B1 and LRAT and survival in proximal and distal colon cancers.

|         |          | Negative v weak v moderate v strong |              | Negative v weak/moderate/strong |         | Negative/weak v moderate and strong |              | Negative/weak/moderate v strong |              |
|---------|----------|-------------------------------------|--------------|---------------------------------|---------|-------------------------------------|--------------|---------------------------------|--------------|
|         |          | $\chi^2$                            | p-value      | $\chi^2$                        | p-value | $\chi^2$                            | p-value      | $\chi^2$                        | p-value      |
| CYP26A1 |          |                                     |              |                                 |         |                                     |              |                                 |              |
|         | Proximal | 0.449                               | 0.930        | 0.219                           | 0.640   | 0.012                               | 0.914        | 0.051                           | 0.822        |
|         | Distal   | 1.059                               | 0.787        | 0.378                           | 0.539   | 0.673                               | 0.412        | 0.006                           | 0.941        |
| CYP26B1 |          |                                     |              |                                 |         |                                     |              |                                 |              |
|         | Proximal | 1.728                               | 0.631        | 0.076                           | 0.783   | 1.280                               | 0.258        | 1.285                           | 0.257        |
|         | Distal   | 9.716                               | <b>0.021</b> | 4.617                           | 0.032   | 8.853                               | <b>0.003</b> | 4.254                           | <b>0.039</b> |
| LRAT    |          |                                     |              |                                 |         |                                     |              |                                 |              |
|         | Proximal | 2.580                               | 0.461        | 0.705                           | 0.401   | 0.171                               | 0.680        | 1.708                           | 0.191        |
|         | Distal   | 5.484                               | 0.140        | 1.329                           | 0.249   | 4.227                               | <b>0.040</b> | 0.730                           | 0.393        |

Significant values are highlighted in bold
