# Supplementary material for: The Expression and Prognostic Significance of Retinoic Acid Metabolising Enzymes in Colorectal Cancer
Source: PubMed Central journal article supplement (PMC3946526; doi:10.1371/journal.pone.0090776), 2014-03-07
Supplement: pone.0090776.s005.pdf [file pone.0090776.s005.pdf]

**Table S5.** The relationship of the expression of CYP26A1, CYP26B1 and LRAT and survival in colorectal cancers with and without EMVI.

|         |              | Overall  |         | Negative v weak/moderate/strong |              | Negative/weak v moderate/strong |              | Negative/weak/moderate v strong |         |
|---------|--------------|----------|---------|---------------------------------|--------------|---------------------------------|--------------|---------------------------------|---------|
|         |              | $\chi^2$ | p-value | $\chi^2$                        | p-value      | $\chi^2$                        | p-value      | $\chi^2$                        | p-value |
| CYP26A1 |              |          |         |                                 |              |                                 |              |                                 |         |
|         | EMVI present | 4.147    | 0.246   | <0.001                          | 0.984        | 0.046                           | 0.831        | 3.609                           | 0.057   |
|         | EMVI absent  | 0.781    | 0.854   | 0.135                           | 0.714        | 0.199                           | 0.656        | 0.054                           | 0.816   |
| CYP26B1 |              |          |         |                                 |              |                                 |              |                                 |         |
|         | EMVI present | 2.482    | 0.479   | 0.006                           | 0.939        | 1.394                           | 0.238        | 1.943                           | 0.163   |
|         | EMVI absent  | 7.039    | 0.069   | 4.726                           | <b>0.030</b> | 4.235                           | <b>0.040</b> | 3.356                           | 0.067   |
| LRAT    |              |          |         |                                 |              |                                 |              |                                 |         |
|         | EMVI present | 1.795    | 0.616   | 0.183                           | 0.669        | 0.533                           | 0.465        | 0.363                           | 0.547   |
|         | EMVI absent  | 5.599    | 0.133   | 1.506                           | 0.220        | 5.299                           | <b>0.021</b> | 1.479                           | 0.224   |

Significant values are highlighted in bold
