# Supplementary material for: The Expression and Prognostic Significance of Retinoic Acid Metabolising Enzymes in Colorectal Cancer
Source: PubMed Central journal article supplement (PMC3946526; doi:10.1371/journal.pone.0090776), 2014-03-07
Supplement: pone.0090776.s006.pdf [file pone.0090776.s006.pdf]

**Table S6.**

A. Multi-variate analysis of the whole patient cohort including only parameters that would be available if cases are considered to be a biopsy i.e. no information regarding tumour stage, nodal stage or EMVI will be available.

| Variable               | Wald value | p-value          | Hazard ratio (95% CI) |
|------------------------|------------|------------------|-----------------------|
| Age                    | 18.665     | <b>&lt;0.001</b> | 1.730 (1.349-2.219)   |
| Gender                 | 0.098      | 0.754            | 0.963 (0.762-1.217)   |
| Tumour site            | 4.365      | 0.113            | 0.855 (0.625-1.566)   |
| Tumour differentiation | 0.319      | 0.572            | 0.876 (0.553-1.387)   |
| MSI status             | 1.066      | 0.302            | 1.181 (0.861-1.621)   |
| CYP26B1                | 5.730      | <b>0.017</b>     | 1.192 (1.032-1.377)   |
| LRAT                   | 0.011      | 0.917            | 1.015 (0.761-1.355)   |

Significant values are highlighted in bold

B. . Multi-variate analysis of the MSI intact patient cohort including only parameters that would be available if cases are considered to be a biopsy i.e. no information regarding tumour stage, nodal stage or EMVI will be available.

| Variable               | Wald value | p-value          | Hazard ratio (95% CI) |
|------------------------|------------|------------------|-----------------------|
| Age                    | 18.804     | <b>&lt;0.001</b> | 1.821 (1.389-2.387)   |
| Gender                 | 0.312      | 0.577            | 0.929 (0.719-1.202)   |
| Tumour site            | 2.745      | 0.254            | 0.848 (0.613-1.523)   |
| Tumour differentiation | 0.239      | 0.072            | 0.578 (0.319-1.049)   |
| CYP26B1                | 10.972     | <b>0.001</b>     | 1.308 (1.116-1.532)   |
| LRAT                   | 0.197      | 0.657            | 0.930 (0.676-1.280)   |

Significant values are highlighted in bold
